# Supplementary material for: A new, fast, semi-direct implementation of linear scaling local coupled cluster theory
Source: Royal Society of Chemistry journal article supplement (doi:10.1039/b203994j), 2002-01-01
Supplement: appendixa.pdf [file appendixa.pdf]

## Appendix A: Loop structure of the 4-ext integral transformation

Here, we describe briefly the new integral transformation module, which generates the 4-external integral distribution: Two of the three permutational symmetries of the AO integrals are exploited, thus each unique AO integral is effectively computed twice. The third permutational symmetry within the slower shell pair (MN) is discarded in order to avoid simultaneous storage of all three-quarter transformed integrals on disk. Note that the latter set is considerably larger than the final set of fully transformed 4-external integrals. The third and fourth quarter transformation steps are driven by the sparse atom pair and triple lists, and in each transformation step a fast dense matrix multiply constitutes the computational kernel. The partially transformed integrals of each step are stored in sparse form, i.e., as a sparse list of locally dense integral blocks over shell and atom ranges.

```
DO M=1,NShell
  DO N=1,NShell
    Reset memory for (MN|Rr) blocks (Q1 memory)
    DO R=1,Max(M,R)
      DO S=1,R (S=1,Min(M,N) if R==Max(M,N) )
        Compute integral block (MN|RS)
        Check, if new (MN|Rr) blocks will contribute (prescreening)
        If so, increase Q1 memory pointer
        Q1 step over shell block:
        Q1(MN|Rr) = Q1(MN|Rr) + (MN|RS) * P(S,r)
        Q1(MN|Sr) = Q1(MN|Sr) + (MN|RS) * P(R,r)
      END DO
    END DO
  END DO
  DO R=1,NShell
    IF (MN|Rr) exists THEN
      -- s: (r,s) in AtomPairLst, prescreening
      Q2(MN|sr) = Q2(MN|sr) + Q1(MN|Rr) * P(R,s)
    END IF
  END DO
```

```

Check, if new (MN|sr) blocks will contribute (prescreening)
If so, increase Q2 disk pointer
Write Q2(MN|sr) to disk in canonical order:
(for each AtomPair corresponding Q2 integral block,
with AOs mu,nu fixed to shells M,N)
END DO
LOOP over AtomPairLst
DO N=1,NShell
IF (MN|sr) exists THEN
Read Q2(MN|sr) from disk
-- t: (r,s,t) in AtomTriplesLst, prescreening
Q3(Mt|sr) = Q3(Mt|sr) + Q2(MN|sr) * P(N,t)
Write Q3(Mt|sr) to disk
END IF
END DO
END LOOP
IF (overall Q3(Mt|sr) integrals exceed disk buffer) THEN
LOOP over AtomTriplesLst
LOOP over M Shell range
IF (Q3(Mt|sr) exists THEN
Read Q3(Mt|sr) from disk
-- u: (r,s,t,u) in AtomQuadLst, prescreening
Read Q4(ut|sr) from disk
Q4(ut|sr) = Q4(ut|sr) + Q3(Mt|sr) * P(M,u)
Write Q4(ut|sr) to disk
END IF
END LOOP
END LOOP
END IF
END DO
Perform Q4 step analogously for remaining Q3(Mt|sr) integrals
in disk buffer

```
